# Supplementary material for: Doping Pd/SiO2 with Na+: changing the reductive etherification of CO to furan ring hydrogenation of furfural in ethanol
Source: Royal Society of Chemistry journal article supplement (doi:10.1039/c9ra05281j), 2019-01-01

Electronic Supplemental Information to

**Doping Pd/SiO<sub>2</sub> with Na<sup>+</sup>: changing the reductive  
etherification of C=O to furan ring hydrogenation of  
furfural in ethanol**

Yinshuang Long,<sup>[a]</sup> Yun Wang,<sup>[a]</sup> Haihong Wu,<sup>[a]</sup> Teng Xue,<sup>[a]</sup> Peng Wu,<sup>[a]</sup> and Yejun Guan<sup>\*[a]</sup>

Shanghai Key Laboratory of Green Chemistry and Chemical Processes, School of  
Chemistry & Molecular Engineering

East Normal University of China

North Zhongshan Road 3663, Shanghai, China

E-mail: yjguan@chem.ecnu.edu.cn

---

Table S1. Pd loading, particle size and textural properties of Pd/SiO<sub>2</sub> and Pd-Na/SiO<sub>2</sub> catalysts

| Catalyst               | Pd <sup>a</sup><br>(wt.%) | SSA <sup>b</sup><br>(m <sup>2</sup> g <sup>-1</sup> ) | V <sub>total</sub> <sup>c</sup><br>(cm <sup>3</sup> g <sup>-1</sup> ) | D <sup>d</sup><br>(nm) |
|------------------------|---------------------------|-------------------------------------------------------|-----------------------------------------------------------------------|------------------------|
| Pd-SiO <sub>2</sub>    | 2.2                       | 227                                                   | 1.0                                                                   | 8.7                    |
| Pd-Na/SiO <sub>2</sub> | 2.0                       | 155                                                   | 1.3                                                                   | 4.6                    |

- Determined by ICP.
- Calculated by N<sub>2</sub> adsorption with BET method.
- Determined from the adsorption amount of nitrogen at P/P<sub>0</sub> = 0.99.
- Average size of NPs determined by TEM investigation.

---

Table S2. Catalytic hydrogenation of furfural in ethanol over Pd/SiO<sub>2</sub> under different temperature and H<sub>2</sub> pressure.<sup>a</sup>

| Temp.<br>(°C) | H <sub>2</sub><br>(MPa) | Conv.<br>(%) | Sel. (%) <sup>b</sup> |     |       |    |          |
|---------------|-------------------------|--------------|-----------------------|-----|-------|----|----------|
|               |                         |              | EFE                   | FDA | THFDA | FA | THF<br>A |
| 80            | 0.3                     | 91           | 35                    | 30  | 2     | 19 | 5        |
| 100           | 0.3                     | 100          | 58                    | 0   | 0     | 7  | 9        |
| 120           | 0.5                     | 100          | 50                    | 0   | 14    | 10 | 8        |
| 120           | 1                       | 100          | 7                     | 0   | 22    | 0  | 26       |

<sup>a</sup> Reaction conditions: 100 mg of catalyst; reaction time 1 h.

<sup>b</sup> In some cases, other products (not shown) due to the decomposition of EFE were detected.

---

Table S3. The activities of furfural acetalization with ethanol over SiO<sub>2</sub>, alkaline-treated SiO<sub>2</sub> and Pd/SiO<sub>2</sub> catalysts. Reaction conditions: 10 mL of 0.24 M FAL ethanol solution; 120 °C; 100 mg catalyst; 30 min.

| Sample                 | Conv. (%) |
|------------------------|-----------|
| SiO <sub>2</sub>       | 51        |
| SiO <sub>2</sub> -Na   | 0         |
| SiO <sub>2</sub> -K    | 0         |
| Pd/SiO <sub>2</sub>    | 44        |
| Pd-Na/SiO <sub>2</sub> | 0         |
| Pd-K/SiO <sub>2</sub>  | 0         |

---

---

Table S4. Catalytic hydrogenation results of 180  $\mu\text{L}$  of FDA in 10 mL of ethanol over Pd/SiO<sub>2</sub> in presence of 20  $\mu\text{L}$  of furfural or furfuryl alcohol for 10 min under 120 °C and 0.3 MPa H<sub>2</sub> pressure.

| Additive              | FDA Conv.<br>(%) | Sel. (%) |       |       |      |
|-----------------------|------------------|----------|-------|-------|------|
|                       |                  | EFE      | THEFE | THFDA | THFA |
| Fufural (FAL)         | 91               | 34       | 11    | 29    | 8    |
| Furfuryl alcohol (FA) | 12               | 22       | 10    | 60    | -    |

Figure S1. The Na 1s XPS spectra of Pd/SiO<sub>2</sub> and Pd-Na/SiO<sub>2</sub> catalysts.

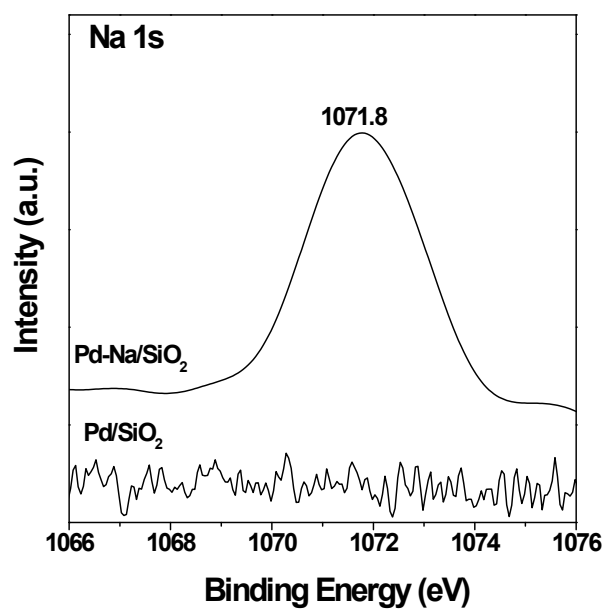

Figure S2. Catalytic hydrogenation of furfural in isopropanol over Pd(-Na)/SiO<sub>2</sub> catalyst. Reaction conditions: 10 mL of 0.24 M FAL ethanol solution; 120 °C; 0.3 MPa H<sub>2</sub>; 100 mg catalyst.

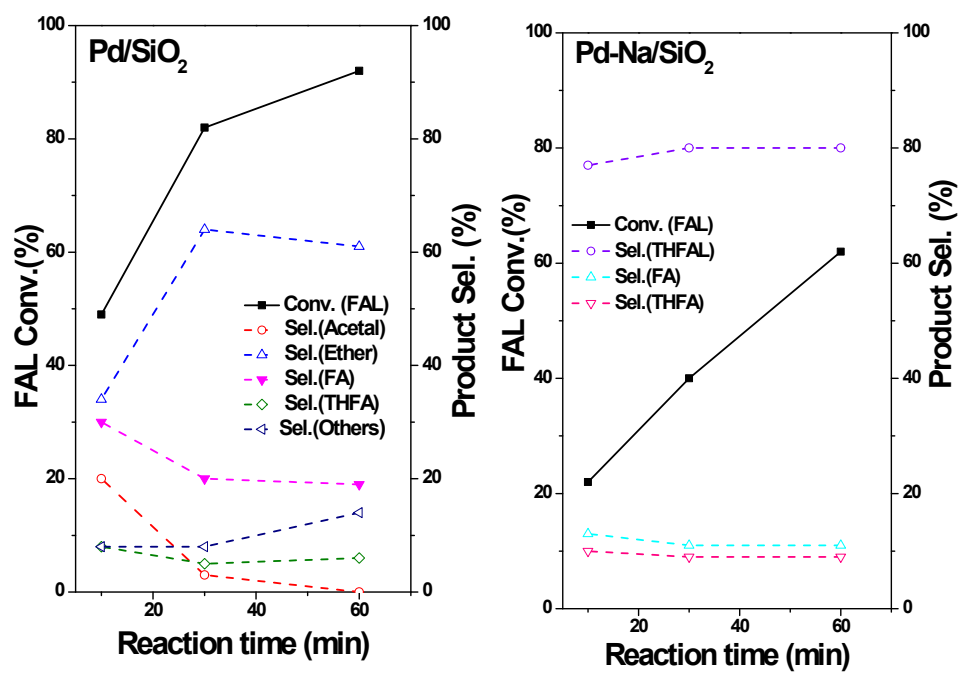

Figure S3. Catalytic hydrogenation of furfural over Pd-K/SiO<sub>2</sub> catalyst. Reaction conditions: 10 mL of 0.24 M FAL ethanol solution; 120 °C; 0.3 MPa H<sub>2</sub>; 100 mg catalyst.

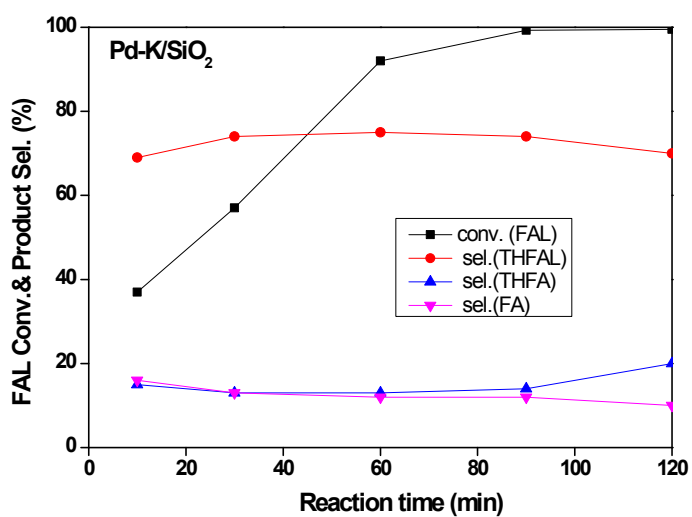

Supplement: c9ra05281j1.pdf [file c9ra05281j1.pdf]
